# Supplementary material for: Liquid crystal polymers for non-reconstructing fluorinated surfaces
Source: Royal Society of Chemistry journal article supplement (doi:10.1039/b810184a), 2008-01-01

## Liquid Crystal Polymers for Non Reconstructing Fluorinated Surfaces

*Laurent Caillier, Elisabeth Taffin de Givenchy, Serge G ribaldi and Fr d ric Guittard\**

Laboratoire de Chimie des Mat riaux Organiques et M talliques (CMOM), Universit  de Nice-Sophia Antipolis, ICN,  
Facult  des Sciences, Parc Valrose, 06108 Nice cedex 2 - France

\* To whom correspondence should be addressed. Tel.: +33 (0)4 92 07 6159;  
fax: +33 (0)4 92 07 6156. E-mail: [Frederic.Guittard@unice.fr](mailto:Frederic.Guittard@unice.fr)

**HF<sub>8</sub>**: The reference polymer was prepared following previous described procedure<sup>1,2</sup> via a free radical polymerization with Azobis-isobutyronitrile (AIBN-Vazo<sup>®</sup> 64 - 0.4% molar) as thermal initiator: 2.39 mmol of the monomer were placed in 1 mL of anhydrous toluene in a three neck flask initially purged three times with nitrogen. The monomer solution was purged using nitrogen and AIBN was added. The solution was then stirred at 85 °C for 16 hours under an oxygen-free nitrogen atmosphere. Purification was achieved by cycles of solubilization in chloroform followed by a precipitation in methanol. The polymer was finally dried under vacuum to give a white solid. 1.21g (98% yield, GLC purity > 99%, GPC in forane 113: Mw = 19.500 g/mol, PD = 2.1). <sup>1</sup>H NMR. (CDCl<sub>3</sub>/TMS, δ ppm J Hz) : 1 – 2.2 (3H, CHCH<sub>2</sub>), 2.50 (2H, CF<sub>2</sub>CH<sub>2</sub>CH<sub>2</sub>, tt, J<sub>HH</sub>=8.81, J<sub>HF</sub>=17.86), 4.50 (2H, CF<sub>2</sub>CH<sub>2</sub>CH<sub>2</sub>, t, J=8.81). <sup>19</sup>F NMR (CDCl<sub>3</sub>/CFCl<sub>3</sub>, δ ppm): -81.0 (2F, CF<sub>2</sub>), -114.7 (6F, CF<sub>2</sub>), -122.8 (2F, CF<sub>2</sub>), -123.4 (2F, CF<sub>2</sub>), -124.0 (2F, CF<sub>2</sub>), -126.6 (3F, CF<sub>3</sub>).

1 S. Saidi, F. Guittard, C. Guimon, S. G ribaldi, *J. Polym. Sci. Part A Polym. Chem.*, 2005, **43**, 3737.

2 S. Saidi, F. Guittard, C. Guimon, S. G ribaldi, *Appl. Polym. Sci.*, 2006, **99**, 821.

### Results of TGA

| Polymers                        | IDT | T <sub>1%</sub> °C | T <sub>5%</sub> °C | T <sub>10%</sub> °C | T <sub>50%</sub> °C | T <sub>max</sub> °C |
|---------------------------------|-----|--------------------|--------------------|---------------------|---------------------|---------------------|
| HF <sub>4</sub> C <sub>0</sub>  | 220 | 235                | 297                | 322                 | 364                 | 369                 |
| HF <sub>6</sub> C <sub>0</sub>  | 215 | 243                | 307                | 331                 | 370                 | 373                 |
| HF <sub>8</sub> C <sub>0</sub>  | 190 | 201                | 293                | 326                 | 373                 | 376                 |
| HF <sub>8</sub> C <sub>2</sub>  | 180 | 185                | 239                | 274                 | 356                 | 497                 |
| HF <sub>8</sub> C <sub>11</sub> | 112 | 123                | 203                | 280                 | 362                 | 384                 |

IDT: Initial Degradation Temperature, T<sub>1%</sub>, T<sub>5%</sub>, T<sub>10%</sub>, T<sub>50%</sub>, respectively temperature with a loss of 1, 5, 10, 50 % of the initial mass. T<sub>max</sub> temperature with maximal degradation ratio (dm/dT max).

DSC traces for monomers

1a, 1b, 1c

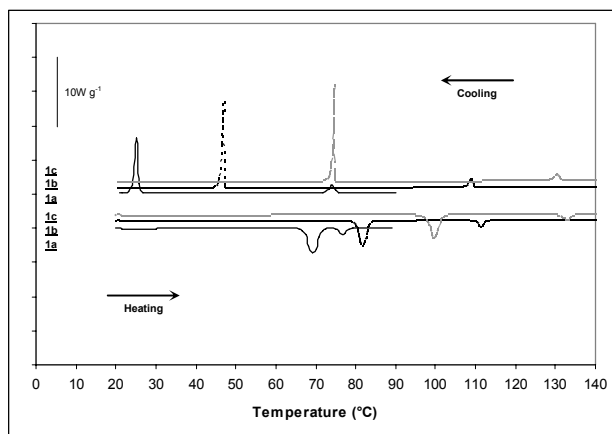

2

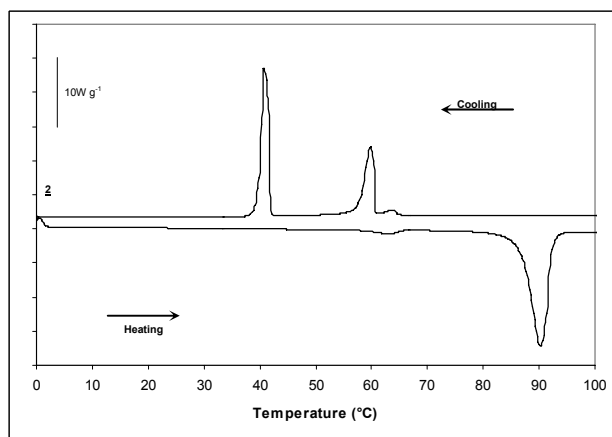

3

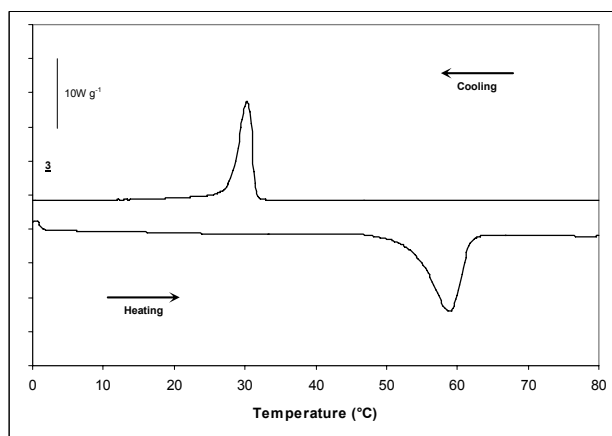

DSC traces for LC polymers

**HF<sub>6</sub>C<sub>0</sub>**

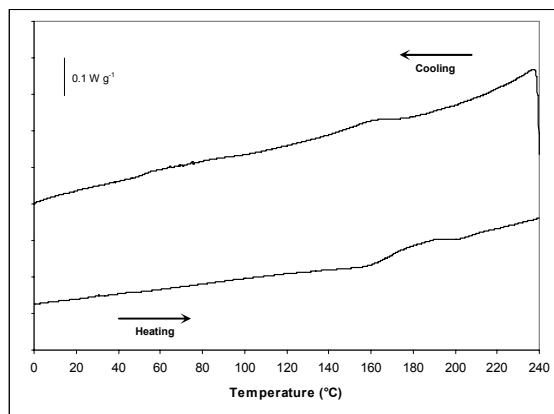

**HF<sub>8</sub>C<sub>0</sub>**

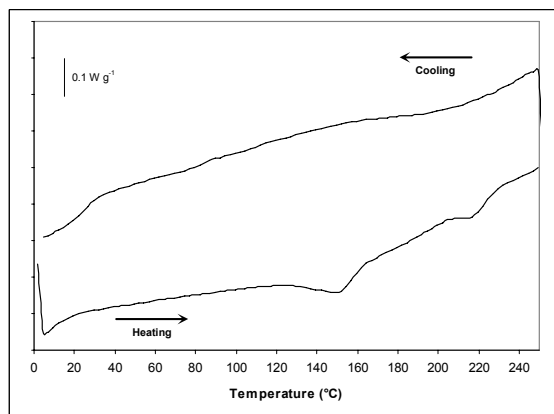

**HF<sub>8</sub>C<sub>2</sub>**

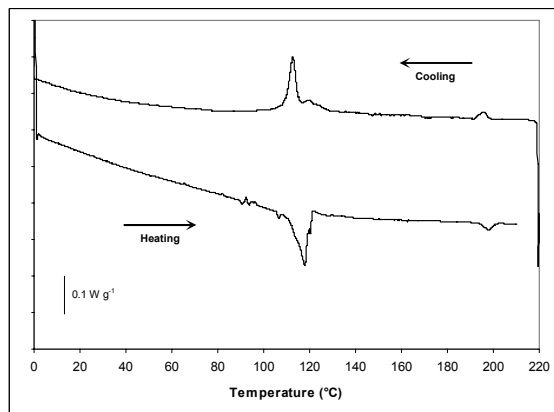

**HF<sub>8</sub>C<sub>11</sub>**

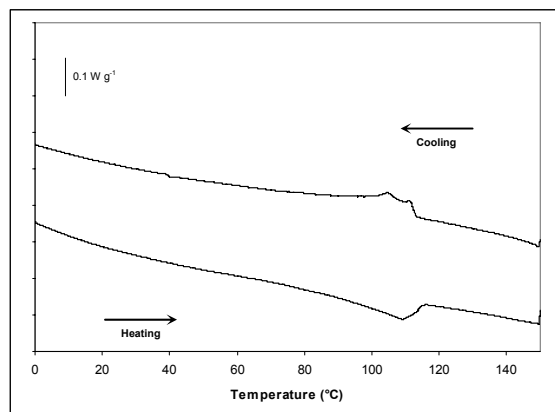

Supplement: b810184a.pdf [file b810184a.pdf]
